# Supplementary material
Source: PubMed Central journal article supplement (PMC7260990)
Supplement: pnas.2001124117.sapp.pdf [file pnas.2001124117.sapp.pdf]

# PNAS

[www.pnas.org](http://www.pnas.org)

Supplementary Information for

Oocytes can efficiently repair DNA double strand breaks to restore genetic integrity and protect offspring health.

Jessica M Stringer, Amy Winship, Nadeen Zerafa, Matthew Wakefield and Karla Hutt.

Karla Hutt

Email: [karla.hutt@monash.edu](mailto:karla.hutt@monash.edu)

**This PDF file includes:**

Figures S1 to S4  
Tables S1 to S2

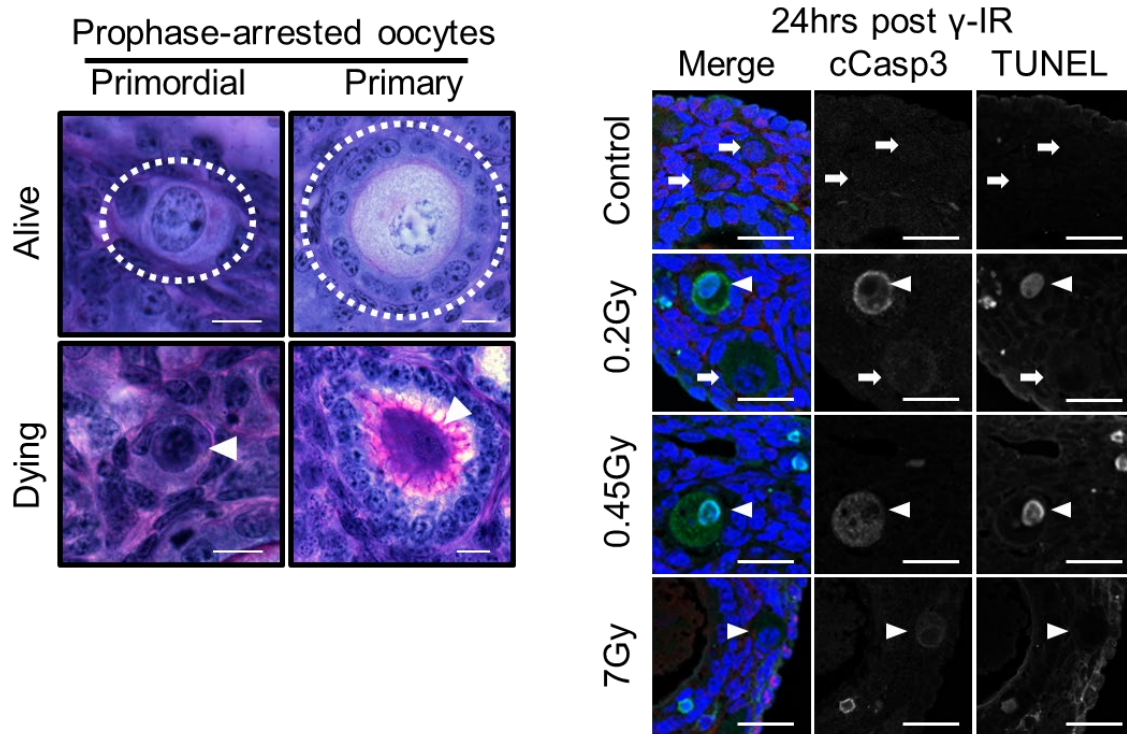

**Fig. S1.** WT mice (PN10) were exposed to whole body  $\gamma$ -irradiation at 0.1, 0.2, 4.5 or 7 Gy. Prophase-arrested oocytes in primordial and growing follicles were analysed 24 hours later. Follicles were classified as alive or dying based on standard criteria in PAS stained 20  $\mu$ m thick histological sections, to allow depth in the z-axis and accurate assessment of morphology (A). An example of a morphologically normal primordial and growing follicle is shown (dotted lines). Dying oocytes in primordial follicles were characterised by condensed nuclei, while dying oocytes in growing follicles were of irregular shape or collapsed, typically with intense staining (white arrow heads). Sections were also stained for cleaved capase-3 (green) and TUNEL (cyan) to confirm apoptosis of oocytes (B). DNA is counterstained with DAPI (blue). Representative images are shown. Scale represents 10  $\mu$ m.

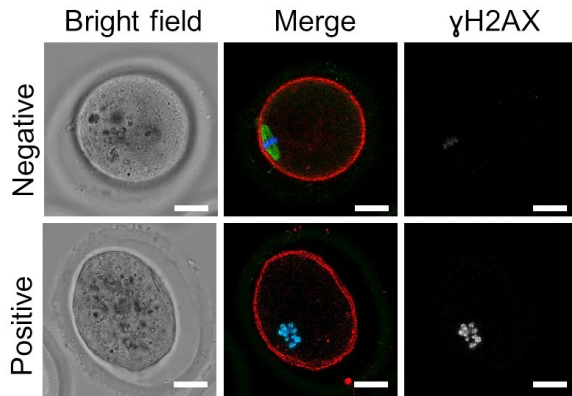

**Fig. S2.**  $\gamma$ H2AX staining in oocytes harvested from the oviduct of  $\gamma$ -irradiated (0.1 and 0.45 Gy) TAp63<sup>-/-</sup> mice following exogenous hormonal stimulation. Representative images are shown of oocytes stained with f-actin (red) to mark the oolema,  $\alpha\beta$ -tubulin (green) to label the spindle, DAPI to label the DNA on the metaphase plate, and  $\gamma$ H2AX (cyan) to indicate DNA damage. Overall,  $\gamma$ H2AX staining was only rarely observed, with 2/107, 1/72 and 1/15, oocytes from un-irradiated controls, 0.1 and 0.45 Gy treated mice, respectively, positively staining for  $\gamma$ H2AX.

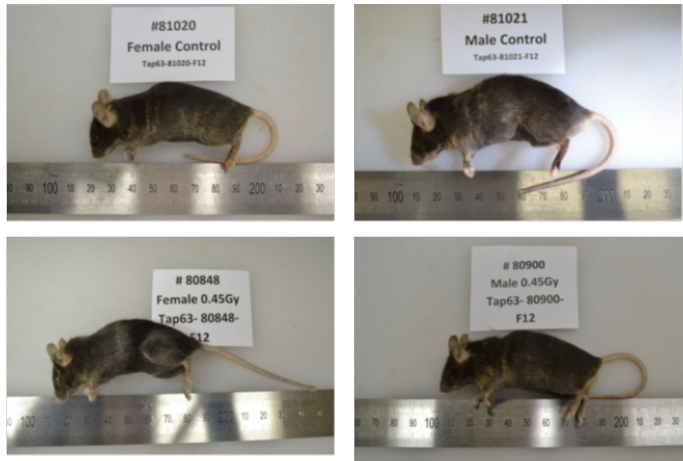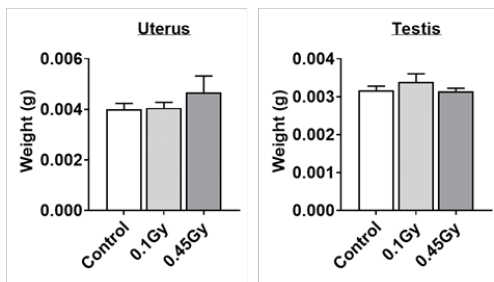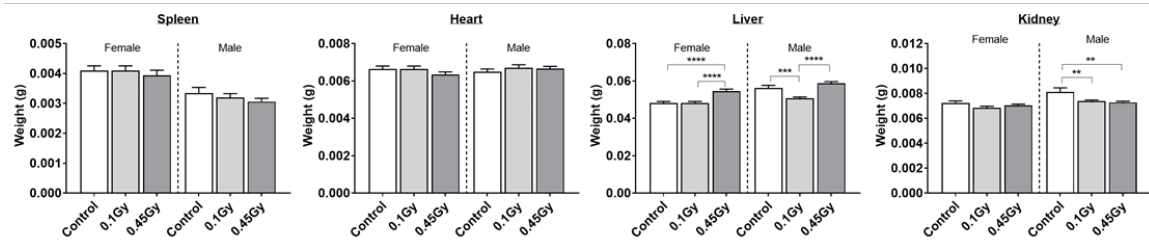

**Fig. S3.** Female TAp63<sup>-/-</sup> mice were untreated or exposed to whole body  $\gamma$ -irradiation at PN10. The females were allowed to reach sexual maturity and then mated with untreated C57Bl6 males. All offspring were of normal appearance. Uterus, testis, spleen, heart, liver and kidney weights (corrected for body weight) were determined for offspring 60-65 days of age. All data are expressed as mean  $\pm$  SEM and analysed by one-way ANOVA followed by Tukey's post-hoc test. \*\*  $p < 0.005$ , \*\*\*  $p < 0.0005$ , \*\*\*\*  $p < 0.0001$ .

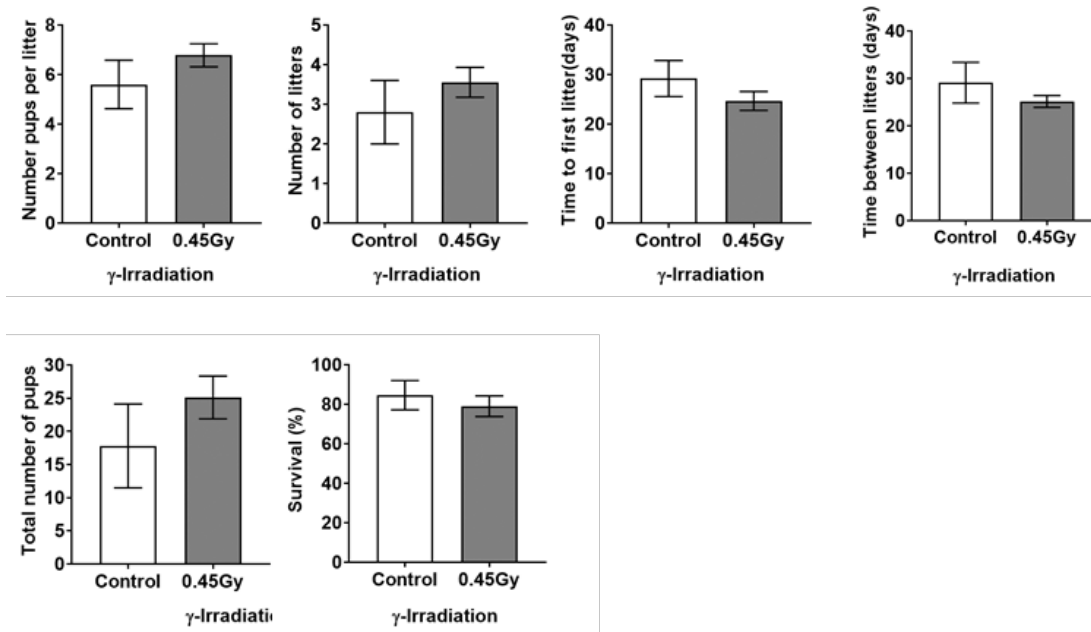

**Fig. S4.** Female *Tap63*<sup>-/-</sup> mice were untreated or exposed to whole body  $\gamma$ -irradiation (0.45Gy) at PN10. The females were allowed to reach sexual maturity and then mated with untreated C57Bl6 males for 4 months. The fertility of their offspring (n=5/9 control/irradiated) was subsequently determined once they reached sexual maturity. All data are expressed as mean +/- SEM and analysed t-test. No significant differences observed.

**Table S1.** Mutations in offspring from control and 0.45 Gy exposed *TAp63<sup>-/-</sup>* dams

| Sample ID | Chr       | Start       | Ref                         | Alt  | Type |
|-----------|-----------|-------------|-----------------------------|------|------|
| Ctrl-2    | chr1      | 142424013   | GA                          | G    | DEL  |
|           | chr2      | 21234564    | GTA                         | G    | DEL  |
|           | chr2      | 33285092    | AC                          | A    | DEL  |
|           | chr3      | 159031012   | ATC                         | A    | DEL  |
|           | chr9      | 95197567    | GA                          | TC   | MNV  |
|           | chr10     | 47670088    | GC                          | AG   | MNV  |
|           | chr13     | 114878937   | CTGGCGACTGTCGAATCAGCTG      | C    | DEL  |
| chr16     | 43342482  | GA          | G                           | DEL  |      |
| Ctrl-4    | chr2      | 44977928    | GA                          | G    | DEL  |
|           | chr4      | 137632351   | AGT                         | A    | DEL  |
|           | chr6      | 113301851   | CAACTTCCCTGCTTCTTAGGAGAATGG | C    | DEL  |
|           | chr7      | 63901624    | AAGCAGCCGAG                 | A    | DEL  |
|           | chr11     | 12462970    | TA                          | T    | DEL  |
|           | chr14     | 74602993    | TG                          | T    | DEL  |
|           | chr16     | 50787510    | TA                          | T    | DEL  |
| 45Gy-1    | chr4      | 143354948   | AA                          | TT   | MNV* |
|           | chr10     | 35338260    | TG                          | T    | DEL  |
|           | chr19     | 25515196    | GCA                         | G    | DEL  |
| 45Gy-2    | chr1      | 192985984   | ATCTT                       | A    | DEL  |
|           | chr3      | 125203310   | AG                          | A    | DEL  |
|           | chr3      | 153530566   | CT                          | C    | DEL  |
| chr8      | 128472818 | CAGATCTATCA | C                           | DEL  |      |
| 45Gy-4    | chr8      | 124164289   | AG                          | A    | DEL  |
| 45Gy-5    | chr2      | 113771324   | CT                          | C    | DEL  |
|           | chr3      | 123511384   | GCACGGTGGCA                 | G    | DEL* |
|           | chr15     | 50424849    | G                           | T    | SNV  |
| 45Gy-6    | chr1      | 44210408    | ATAT                        | A    | DEL  |
|           | chr1      | 175733357   | TGTTAA                      | T    | DEL* |
|           | chr14     | 63871659    | TTGT                        | GGGG | MNV  |
|           | chr15     | 38432167    | TT                          | GG   | MNV  |
| 45Gy-7    | chr7      | 61561029    | AA                          | TT   | MNV* |
|           | chr14     | 101768349   | ATGGGAAAGAATT               | A    | DEL  |
| 45Gy-8    | chr11     | 105452979   | GGACACCGGCTCTGAGCT          | G    | DEL  |
| 45Gy-9    | chr15     | 21542393    | CTGATTCATTATCACA            | C    | DEL  |
|           | chrX      | 75759372    | TC                          | AT   | MNV  |
| 45Gy-10   | chr2      | 22846313    | AG                          | A    | DEL  |
| 45Gy-11   | chr4      | 25328233    | TTAA                        | T    | DEL  |
|           | chr13     | 40021517    | ACC                         | A    | DEL* |
| 45Gy-12   | chr8      | 49726705    | TA                          | T    | DEL  |
|           | chr14     | 89208425    | TG                          | CT   | MNV  |
|           | chr15     | 38303626    | CA                          | C    | DEL  |
| 45Gy-13   | chr1      | 112547472   | TC                          | T    | DEL  |
|           | chr2      | 116100098   | TCTCAAAGATCAACGG            | T    | DEL  |
|           | chr4      | 27931005    | TA                          | T    | DEL  |
|           | chr14     | 99600450    | TGA                         | T    | DEL* |
| 45Gy-15   | chr2      | 99531568    | TAA                         | T    | DEL  |
| 45Gy-16   | chr18     | 50065881    | AGTACTT                     | A    | DEL  |
| 45Gy-17   | chr7      | 29538444    | TG                          | T    | DEL* |
|           | chr17     | 73243897    | ACCAC                       | A    | DEL  |
| 45Gy-18   | chr9      | 118777509   | A                           | AT   | INS  |
| 45Gy-19   | chr1      | 178884650   | ACAGCCCTAAGCTGT             | A    | DEL  |
|           | chr3      | 130524636   | GA                          | TT   | MNV* |
| 45Gy-20   | chr9      | 105204821   | CTG                         | C    | DEL# |
|           | chr13     | 63416304    | TCAC                        | CAAG | MNV  |
|           | chr15     | 14022182    | CAT                         | C    | DEL  |

\*excluded on manual review – PCR duplicates

#frameshift variant impacting Nek11 (ENSMUSG00000035032) Nek11:p.A527X

**Table S2.** Summary of mutation rates in offspring from control and 0.45 Gy exposed *TAp63<sup>-/-</sup>* dams

| <b>TAp63<sup>-/-</sup> dams</b> | <b># Offspring</b>    | <b>Total mutations</b> | <b>Mutation rate (per base per generation)</b> |
|---------------------------------|-----------------------|------------------------|------------------------------------------------|
| <b>Control (n=2)</b>            | 2 (female)            | 15                     | $5.2 \times 10^{-9} \pm 2.7 \times 10^{-9}$    |
| <b>0.45Gy (n=5)</b>             | 18 (9 female; 9 male) | 32                     | $1.2 \times 10^{-9} \pm 0.44 \times 10^{-9}$   |
